# Supplementary material for: A highly stable elastic electrode via direct covalent crosslinking for strain sensors
Source: Royal Society of Chemistry journal article supplement (doi:10.1039/d3tc00442b), 2023-01-01
Supplement: d3tc00442b1.pdf [file d3tc00442b1.pdf]

Electronic Supplementary Material (ESI) for Journal of Materials Chemistry C.

This journal is © The Royal Society of Chemistry 2023

### Supporting Information

#### **A highly stable elastic electrode via direct covalent crosslinking for strain sensor**

Liping Wang,<sup>a</sup> Ben-Lin Hu,<sup>\*a</sup>, Fengyuan Zhang,<sup>a</sup> Yinxia Zhang,<sup>ab</sup> Junming Li,<sup>ab</sup> Tianhua Xu<sup>ac</sup> and Run-Wei Li<sup>\*a</sup>

<sup>a</sup> CAS Key Laboratory of Magnetic Materials and Devices, and Zhejiang Province Key Laboratory of Magnetic Materials and Application Technology, Ningbo Institute of Materials Technology and Engineering, Chinese Academy of Sciences, Ningbo 315201, China

<sup>b</sup> Nano Science and Technology Institute, University of Science and Technology of China, Suzhou 215123, China

<sup>c</sup> College of Materials Science and Opto-Electronic Technology, University of Chinese Academy of Sciences, Beijing 100049, China

\*Corresponding author. E-mail address: [hubenlin@nimte.ac.cn](mailto:hubenlin@nimte.ac.cn); [runweili@nimte.ac.cn](mailto:runweili@nimte.ac.cn)

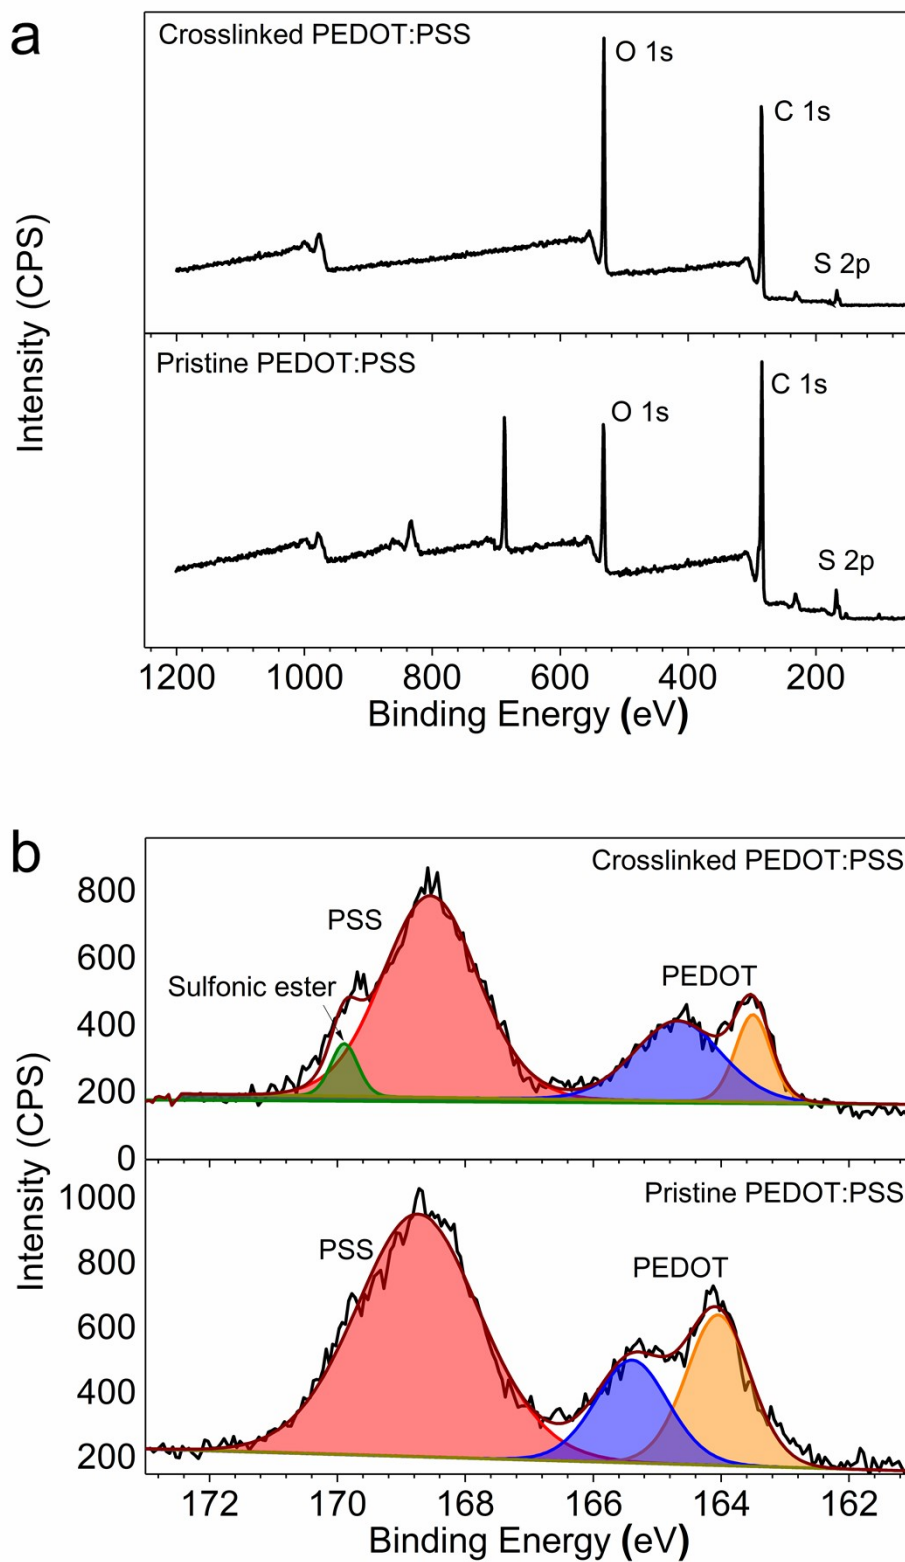

**Figure S1.** a) Wide-scan XPS spectra and b) high-resolution S 2p XPS spectra of crosslinked PEDOT:PSS and pristine PEDOT:PSS

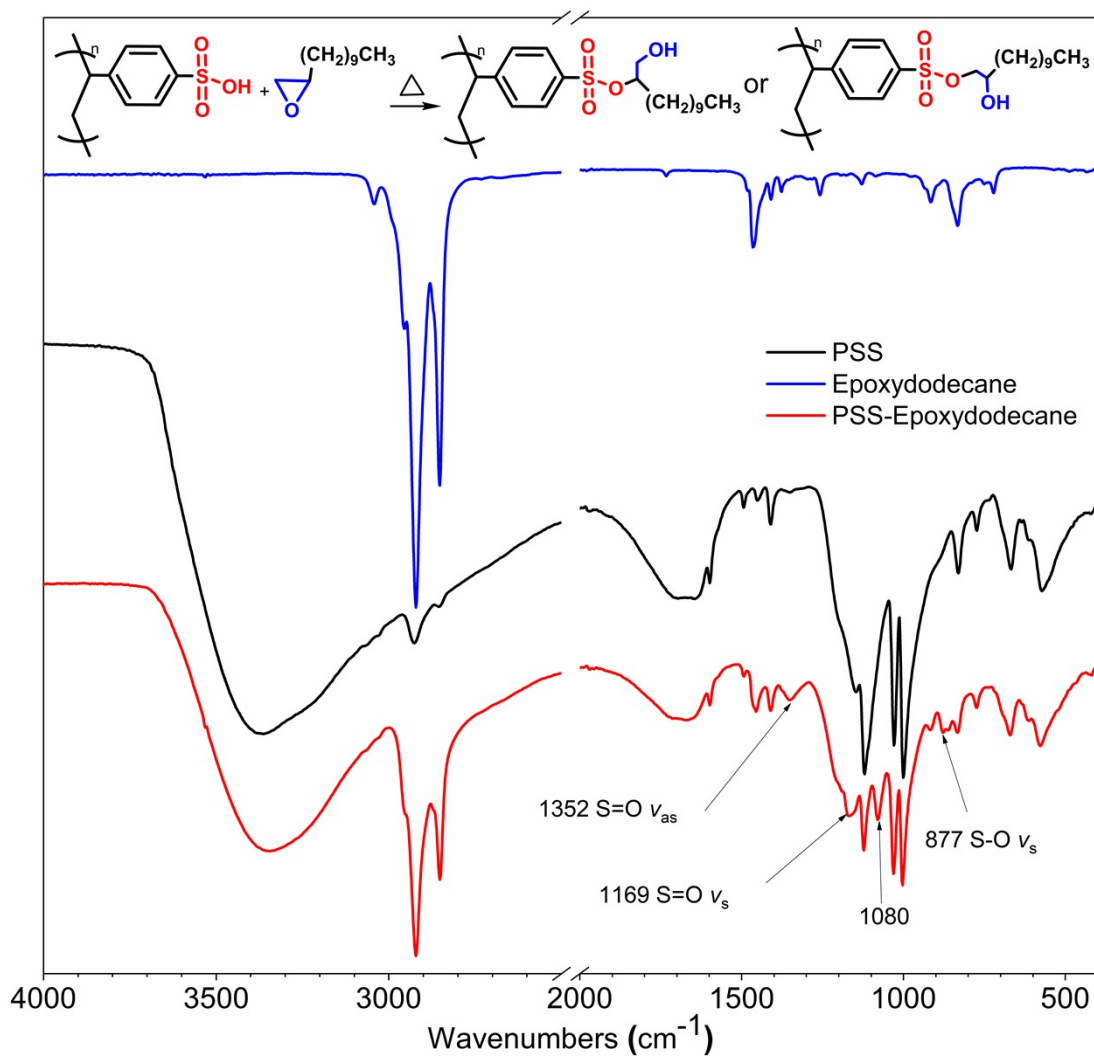

**Figure S2.** ATR-FTIR spectra of PSS, epoxydodecane, and their product.

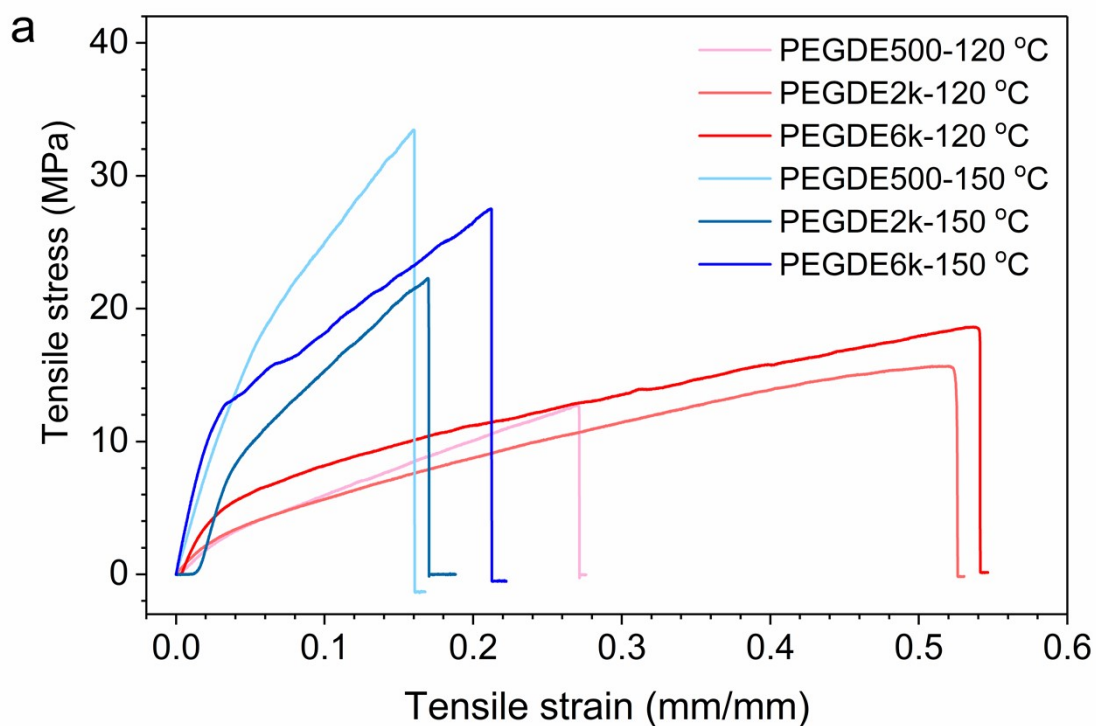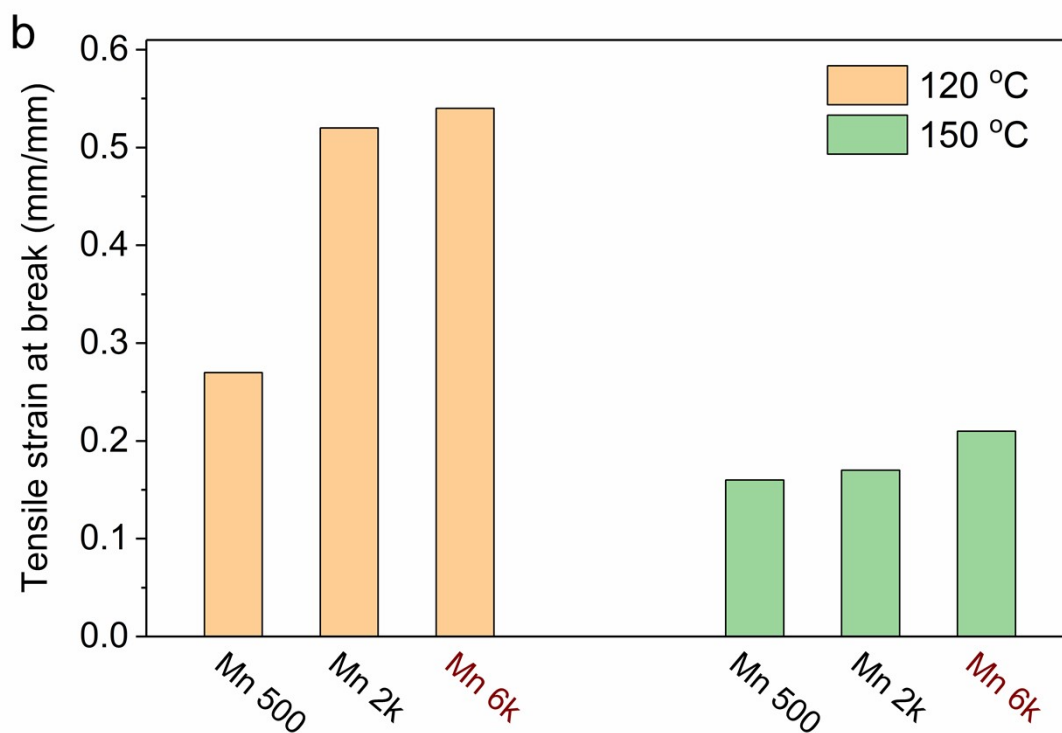

**Figure S3.** a) Strain-stress curves and b) tensile strain at break of bulk crosslinked PEDOT:PSS films using PEGDE crosslinkers with different molecular weights and heated at different temperatures. Sample “PEGDE500-120 °C” represents crosslinked PEDOT:PSS with PEGDE500 reacted at 120 °C.

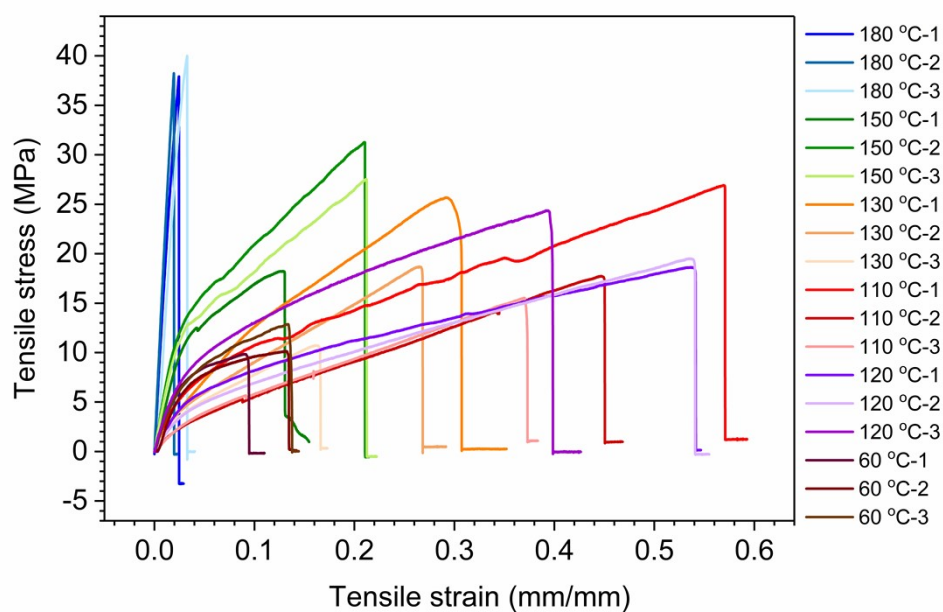

**Figure S4.** Strain-stress curves of bulk crosslinked PEDOT:PSS thick films heated at various temperatures from 60 °C to 180 °C. Tests of each sample were conducted 3 times. Sample “180 °C-1” represents the crosslinked PEDOT:PSS heated at 180 °C for the first strain-stress test. The ratio of PEGDE 6k was 50 wt% for all samples.

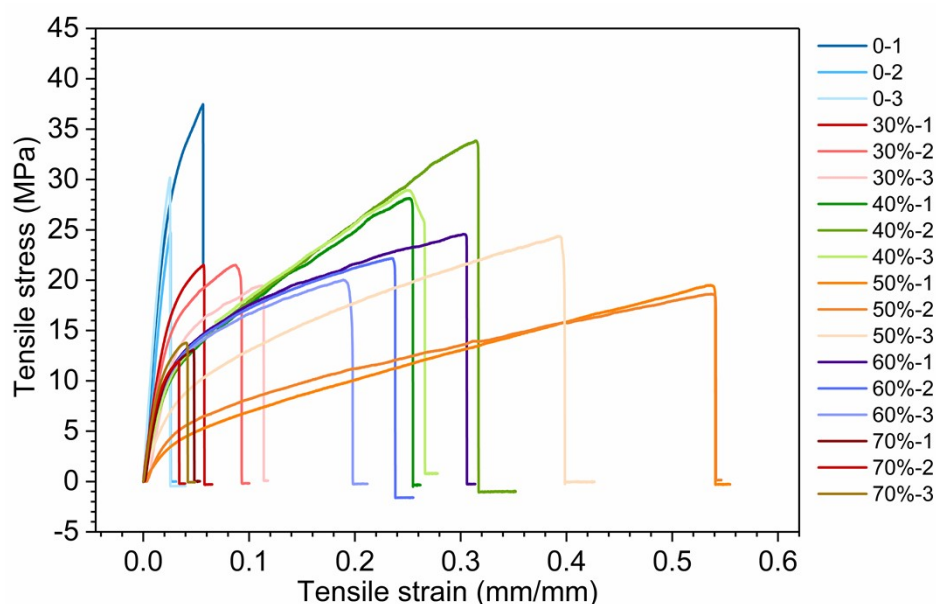

**Figure S5.** Strain-stress curves of bulk crosslinked PEDOT:PSS thick films mixed with different weight ratio of PEGDE. Tests of each sample were conducted 3 times. Sample “30%-2”, for example, represents the crosslinked PEDOT:PSS with PEGDE ratio of 30 wt% for the second strain-stress test. All the films were crosslinked at 120 °C.

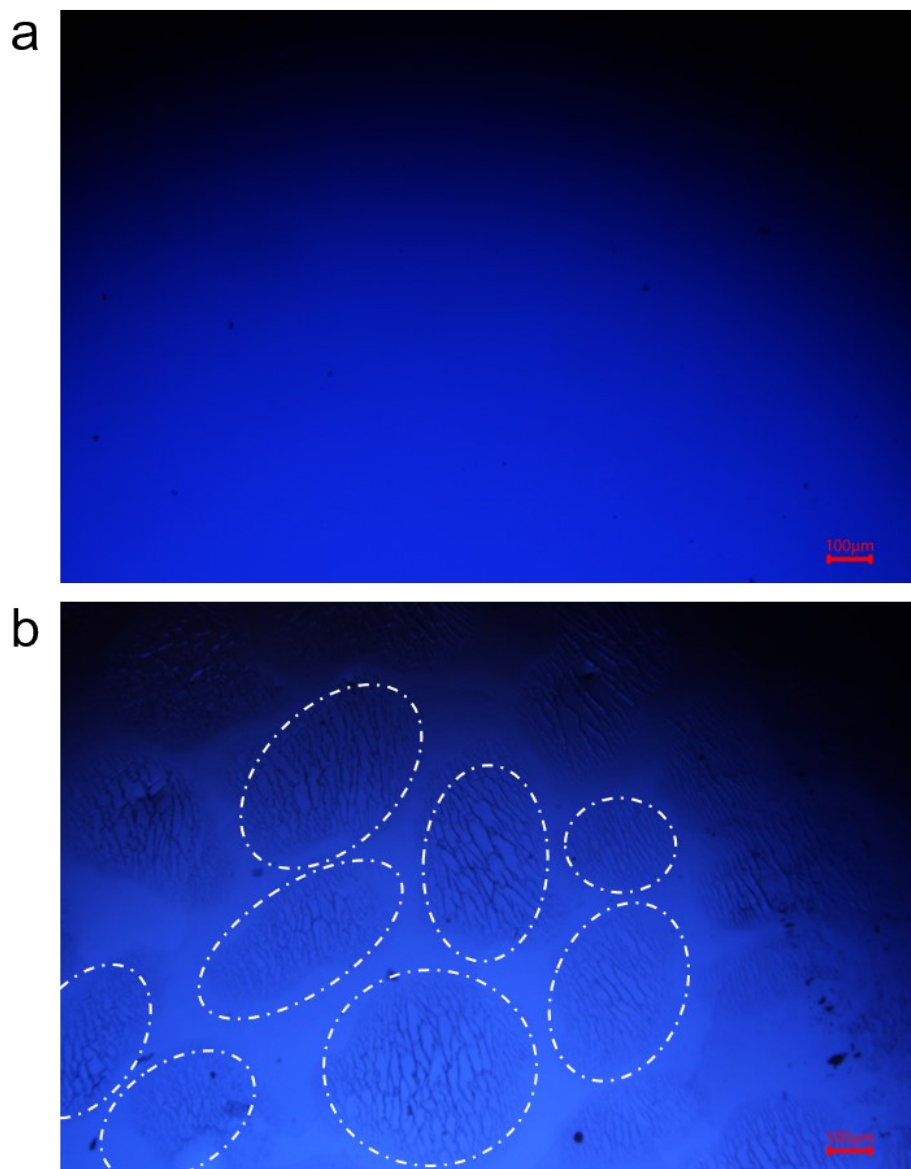

**Figure S6.** Optical microscope images of crosslinked PEDOT:PSS with the PEGDE ratio at a) 50 wt% and b) 70 wt%.



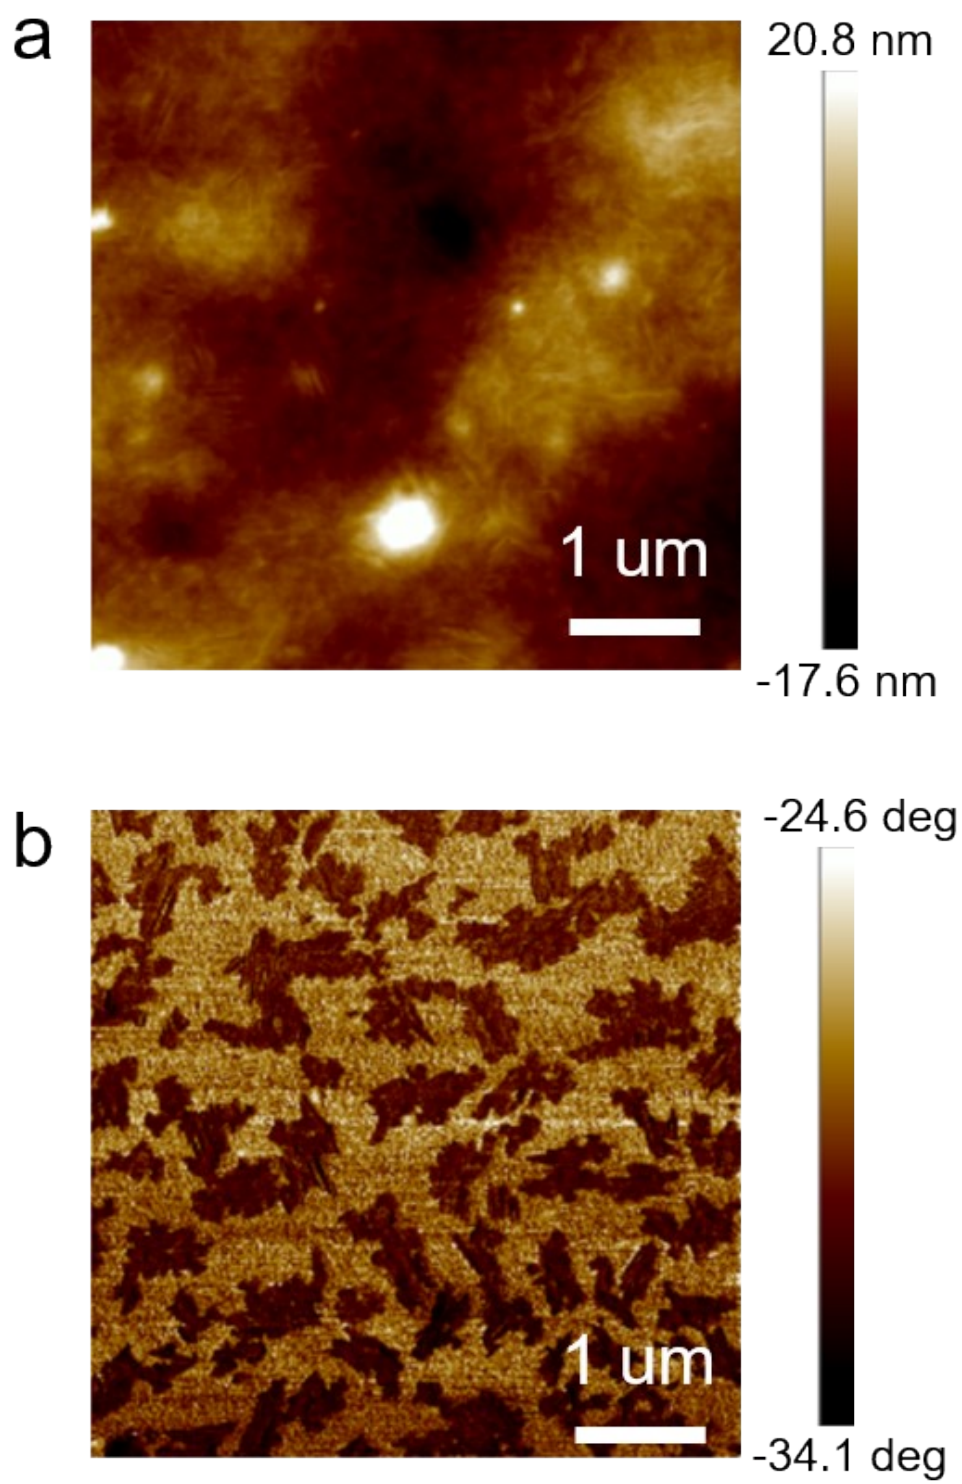

**Figure S7.** a) AFM height images and b) phase images of crosslinked PEDOT:PSS.

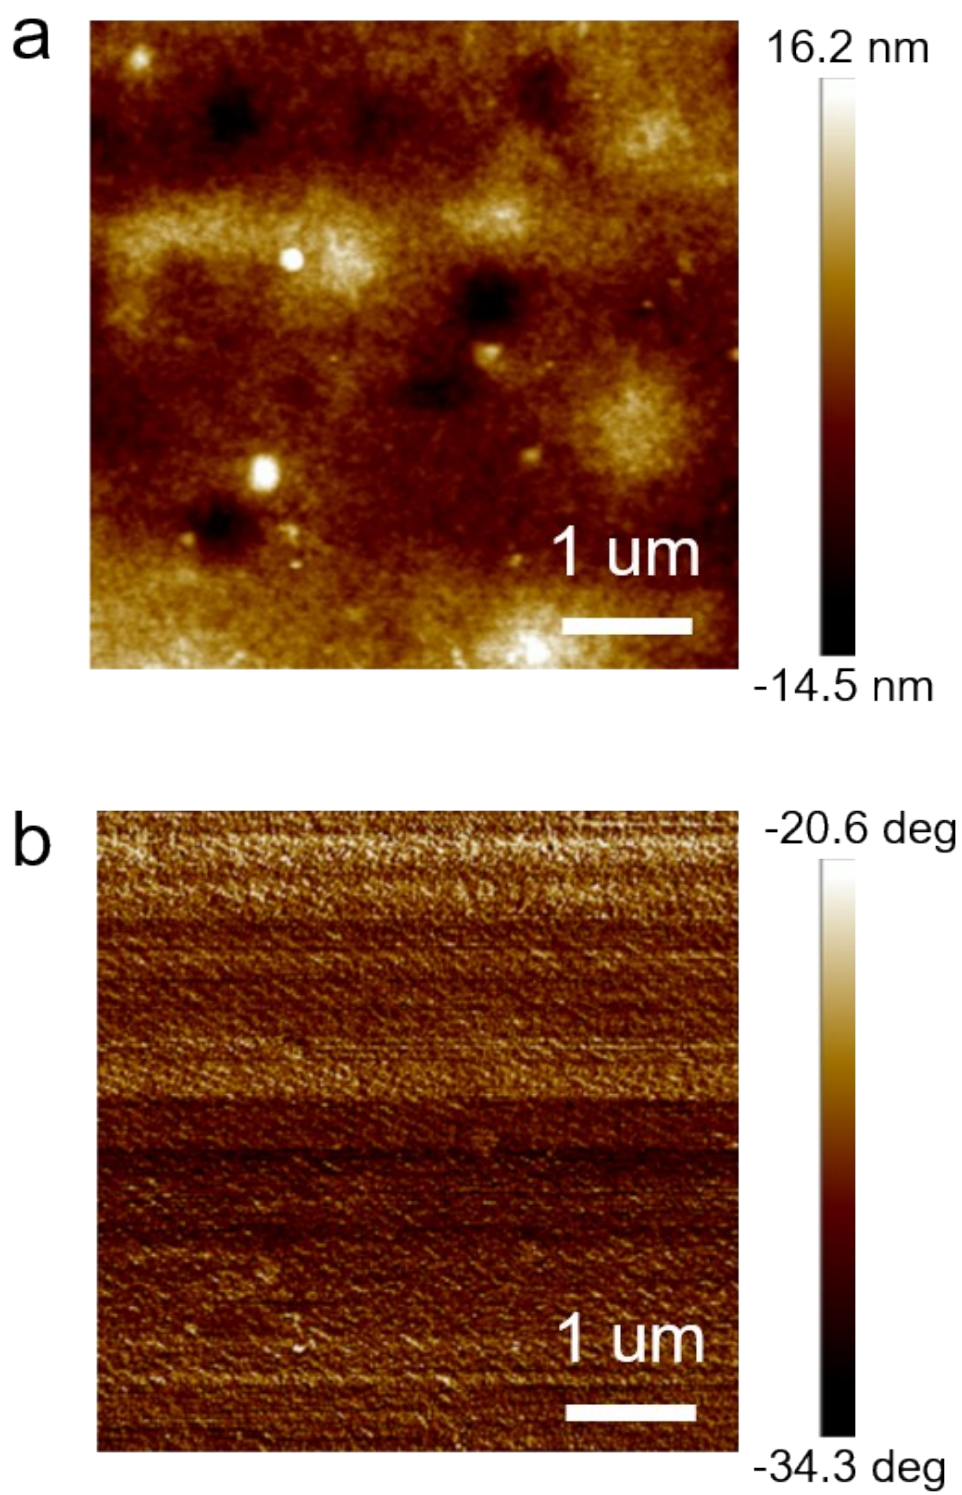

**Figure S8.** a) AFM height images and b) phase images of pristine PEDOT:PSS.



**Table S1.** Mechanical and electrical properties of crosslinked PEDOT:PSS in this work compared to representative stretchable PEDOT:PSS conductors reported in literature.

| Mixed materials   | Conductivity<br>(S m <sup>-1</sup> ) | Break      | Modulus<br>(MPa) | R/R0<br>at<br>50% strain | R/R0<br>at<br>100% strain | Ref.                                        |
|-------------------|--------------------------------------|------------|------------------|--------------------------|---------------------------|---------------------------------------------|
|                   | 60800                                | 133%       | 55               | /                        | /                         |                                             |
| Ionic liquid+DMSO | 42000                                | 112%       | 28               | /                        | /                         | Sci. Adv. 2017, 3, e1602076                 |
|                   | 28800                                | 176%       | 47               | /                        | /                         |                                             |
| Triton X-100      | 7800                                 | 57%        | /                | 1.6                      | /                         | Adv. Mater. 2016, 28, 4455                  |
| Zonyl             | /                                    | /          | /                | 2                        | 18                        | Chem. Mater. 2012, 24, 373                  |
| Sorbitol          | 67100                                | 67%        | 1.9              | 2                        | 12                        | ACS Appl. Mater. Interfaces 2019, 11, 26185 |
| WPU+Sorbitol      | ~40000                               | ~45%       | ~60              | 1.15 at 30% strain       |                           | Nat. Commun 2020, 11, 4683                  |
| PVA+DMSO          | <5000                                | 3.50%      | /                | ~10                      | ~150                      |                                             |
| PAA+DMSO          | 12500                                | 45%        | /                | ~5                       | 25                        | J. Mater. Chem. C, 2020, 8, 6013            |
| PMAA+DMSO         | <5000                                | 3%         | /                | >200                     | >200                      |                                             |
| PEO1000K          | 5260                                 | 38%        | /                | /                        | /                         | ACS Appl. Mater. Interfaces 2015, 7, 18415  |
| PVA89k+DMSO       | 14200                                | 55%        | /                | /                        | /                         |                                             |
| PR-PEGMA          | 11000                                | 150%       | ~800             | 1.5                      | 2.5                       | Science 2022, 375, 1411                     |
| PEGM+PEGDM        | 55000                                | 13%        | <10              | 1.1                      | 30                        | Adv. Funct. Mater. 2020, 2001251            |
| PEGDM+FS30        | ~300000                              | /          | /                | /                        | /                         | Science 2021, 373, 88                       |
| <b>PEGDE</b>      | <b>13100</b>                         | <b>50%</b> | <b>251</b>       | <b>2.2</b>               | <b>9.5</b>                | <b>This work</b>                            |

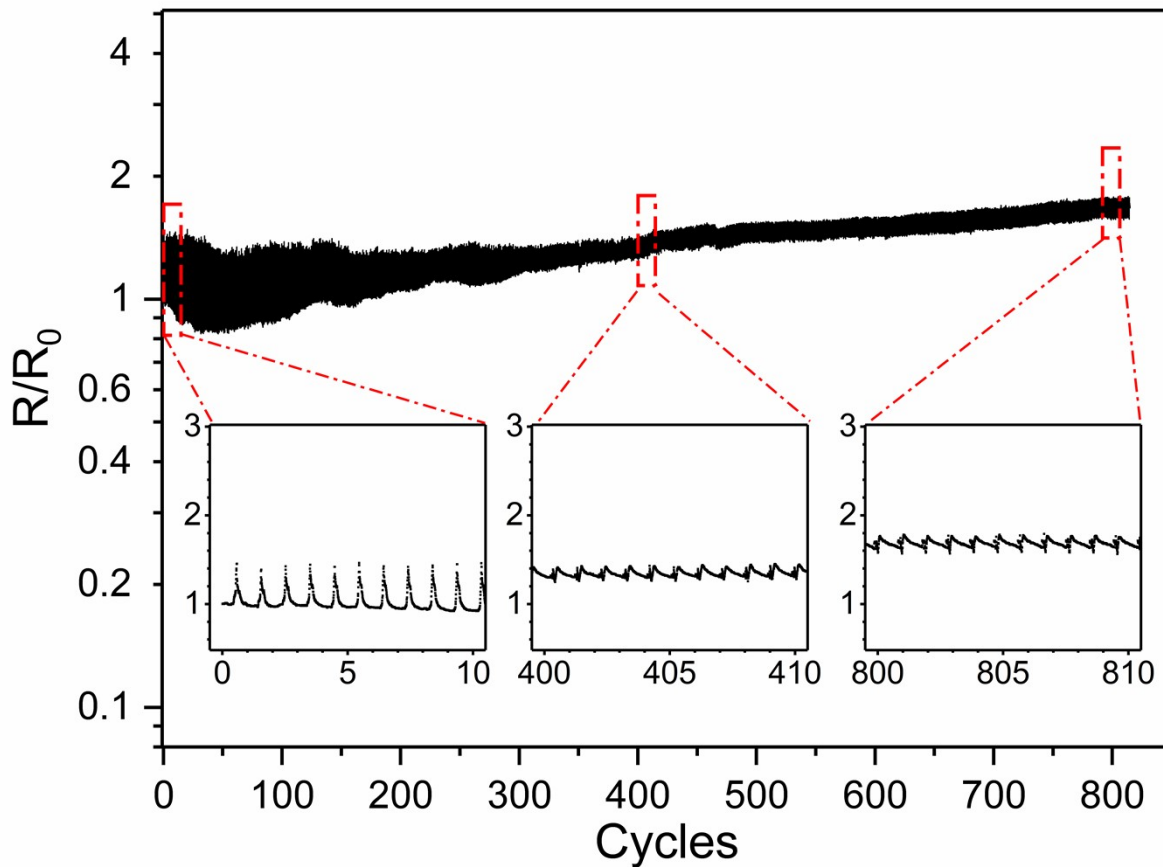

**Figure S9.** Relative changes in resistance of bulk PEDOT:PSS film under cyclic strains of 30% versus cycle time.

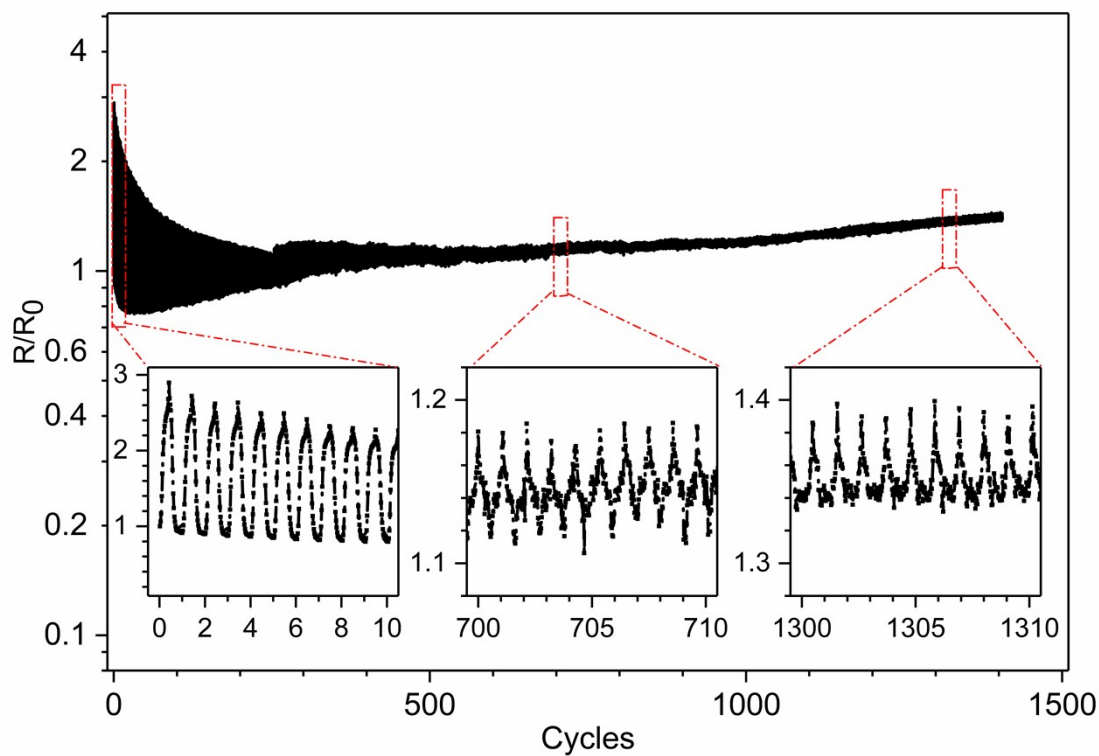

**Figure S10.** Relative changes in resistance of crosslinked PEDOT:PSS thin films under cyclic strains of 50% versus cycle times.

**Table S2.** Key parameters of  $C/C_0$  linear fitting curve

| Linear fitting curve | at 10% strain | at 20% strain | at 30% strain | at 40% strain | at 50% strain |
|----------------------|---------------|---------------|---------------|---------------|---------------|
| Intercept            | 0.991         | 0.989         | 0.995         | 0.996         | 1.001         |
| Slope                | 0.717         | 0.720         | 0.740         | 0.749         | 0.723         |
| R square             | 0.993         | 0.992         | 0.999         | 0.997         | 0.999         |

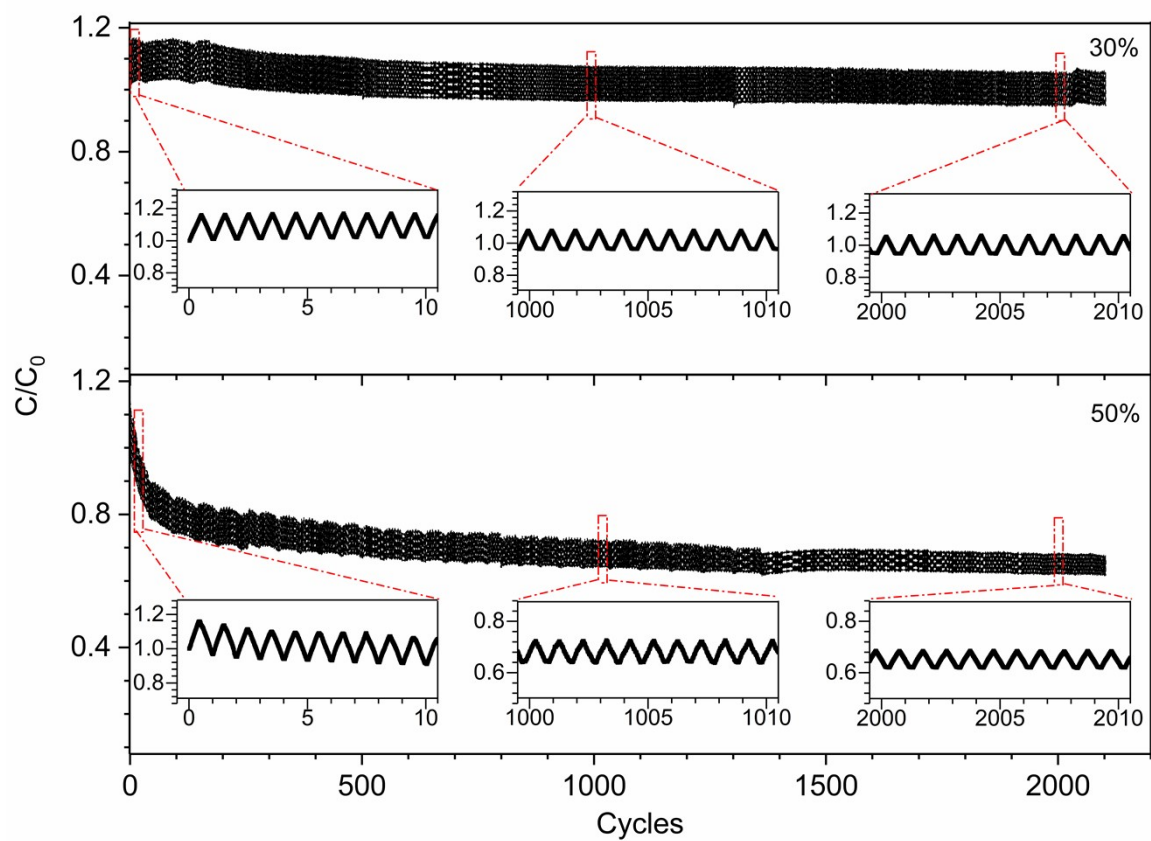

**Figure S11.** Relative change in capacitance of sensors under cyclic stretching of 30% and 50% versus cycle times.
